# Supplementary material for: Identifying Potential Neoantigens for Cervical Cancer Immunotherapy Using Comprehensive Genomic Variation Profiling of Cervical Intraepithelial Neoplasia and Cervical Cancer
Source: Front Oncol. 2021 Jun 17;11:672386. doi: 10.3389/fonc.2021.672386 (PMC8249860; doi:10.3389/fonc.2021.672386)
Supplement: Supplementary file 6 [file Table_1.xlsx]

## Sheet: Table 1
Table S1 Clinical information of 10 CIN1, 9 CIN2, 6 CIN3 and 10 CCs.
Number	Sample ID	Age	Sex	Race	Biomaterial provider	Pathological diagnosis	FIGO Stage	Differentiation Status	TNM	HPV Infection	HPV Strains
1	T1	51	Female	Chinese	Shenzhen People's Hospital, Second Clinical Medical College of Jinan University	Adenocarcinoma	IIB	Unknown	T2bN0M0	Unknown	Unknown
2	T2	38	Female	Chinese	Shenzhen People's Hospital, Second Clinical Medical College of Jinan University	Squamous cell carcinoma	IB1	Unknown	T1b1N0M0	Unknown	Unknown
3	T3	63	Female	Chinese	Shenzhen People's Hospital, Second Clinical Medical College of Jinan University	Squamous cell carcinoma	IIA1	Moderately differentiated	T2a1N0M0	Unknown	Unknown
4	T4	47	Female	Chinese	Shenzhen People's Hospital, Second Clinical Medical College of Jinan University	Adenocarcinoma	IB1	Moderately differentiated	Unknown	Unknown	Unknown
5	T5	53	Female	Chinese	Shenzhen People's Hospital, Second Clinical Medical College of Jinan University	Adenocarcinoma	IIB	Unknown	Unknown	Unknown	Unknown
6	T6	63	Female	Chinese	Shenzhen People's Hospital, Second Clinical Medical College of Jinan University	Squamous cell carcinoma	IB1	Unknown	T1b1N0M0	Unknown	Unknown
7	T7	27	Female	Chinese	Shenzhen People's Hospital, Second Clinical Medical College of Jinan University	Squamous cell carcinoma	IB1	Unknown	T1b1N1M0	Negative	NA.
8	T8	53	Female	Chinese	Shenzhen People's Hospital, Second Clinical Medical College of Jinan University	Squamous cell carcinoma	IB1	Unknown	Unknown	Unknown	Unknown
9	T9	46	Female	Chinese	Shenzhen People's Hospital, Second Clinical Medical College of Jinan University	Squamous cell carcinoma	IB1	Unknown	Unknown	Unknown	Unknown
10	T10	47	Female	Chinese	Shenzhen People's Hospital, Second Clinical Medical College of Jinan University	Squamous cell carcinoma	IB1	Unknown	T1bN1M0	Unknown	Unknown
11	CIN1-1	56	Female	Chinese	Shenzhen People's Hospital, Second Clinical Medical College of Jinan University	CIN1	NA.	NA.	NA.	Negative	NA.
12	CIN1-2	55	Female	Chinese	Shenzhen People's Hospital, Second Clinical Medical College of Jinan University	CIN1	NA.	NA.	NA.	Unknown	Unknown
13	CIN1-3	33	Female	Chinese	Shenzhen People's Hospital, Second Clinical Medical College of Jinan University	CIN1	NA.	NA.	NA.	Negative	NA.
14	CIN1-4	46	Female	Chinese	Shenzhen People's Hospital, Second Clinical Medical College of Jinan University	CIN1	NA.	NA.	NA.	Positive	HPV31
15	CIN1-5	56	Female	Chinese	Shenzhen People's Hospital, Second Clinical Medical College of Jinan University	CIN1	NA.	NA.	NA.	Positive	HPV18,31
16	CIN1-6	34	Female	Chinese	Shenzhen People's Hospital, Second Clinical Medical College of Jinan University	CIN1	NA.	NA.	NA.	Positive	HPV51
17	CIN1-8	45	Female	Chinese	Shenzhen People's Hospital, Second Clinical Medical College of Jinan University	CIN1	NA.	NA.	NA.	Positive	HPV33,58,11
18	CIN1-9	51	Female	Chinese	Shenzhen People's Hospital, Second Clinical Medical College of Jinan University	CIN1	NA.	NA.	NA.	Positive	HPV35,51,81
19	CIN1-10	41	Female	Chinese	Shenzhen People's Hospital, Second Clinical Medical College of Jinan University	CIN1	NA.	NA.	NA.	Positive	HPV52
20	CIN1-11	30	Female	Chinese	Shenzhen People's Hospital, Second Clinical Medical College of Jinan University	CIN1	NA.	NA.	NA.	Positive	HPV16,31,51
21	CIN2-1	42	Female	Chinese	Shenzhen People's Hospital, Second Clinical Medical College of Jinan University	CIN2	NA.	NA.	NA.	Positive	HPV16
22	CIN2-2	35	Female	Chinese	Shenzhen People's Hospital, Second Clinical Medical College of Jinan University	CIN2	NA.	NA.	NA.	Negative	NA.
23	CIN2-3	48	Female	Chinese	Shenzhen People's Hospital, Second Clinical Medical College of Jinan University	CIN2	NA.	NA.	NA.	Positive	HPV16,52
24	CIN2-4	37	Female	Chinese	Shenzhen People's Hospital, Second Clinical Medical College of Jinan University	CIN2	NA.	NA.	NA.	Negative	NA.
25	CIN2-5	33	Female	Chinese	Shenzhen People's Hospital, Second Clinical Medical College of Jinan University	CIN2	NA.	NA.	NA.	Negative	NA.
26	CIN2-6	27	Female	Chinese	Shenzhen People's Hospital, Second Clinical Medical College of Jinan University	CIN2	NA.	NA.	NA.	Negative	NA.
27	CIN2-7	40	Female	Chinese	Shenzhen People's Hospital, Second Clinical Medical College of Jinan University	CIN2	NA.	NA.	NA.	Negative	NA.
28	CIN2-8	32	Female	Chinese	Shenzhen People's Hospital, Second Clinical Medical College of Jinan University	CIN2	NA.	NA.	NA.	Positive	HPV58
29	CIN2-10	38	Female	Chinese	Shenzhen People's Hospital, Second Clinical Medical College of Jinan University	CIN2	NA.	NA.	NA.	Positive	HPV31
30	CIN3-1	47	Female	Chinese	Shenzhen People's Hospital, Second Clinical Medical College of Jinan University	CIN3	NA.	NA.	NA.	Positive	HPV16
31	CIN3-3	48	Female	Chinese	Shenzhen People's Hospital, Second Clinical Medical College of Jinan University	CIN3	NA.	NA.	NA.	Negative	NA.
32	CIN3-4	42	Female	Chinese	Shenzhen People's Hospital, Second Clinical Medical College of Jinan University	CIN3	NA.	NA.	NA.	Positive	HPV16
33	CIN3-5	22	Female	Chinese	Shenzhen People's Hospital, Second Clinical Medical College of Jinan University	CIN3	NA.	NA.	NA.	Positive	HPV16
34	CIN3-6	29	Female	Chinese	Shenzhen People's Hospital, Second Clinical Medical College of Jinan University	CIN3	NA.	NA.	NA.	Positive	HPV52
35	CIN3-7	43	Female	Chinese	Shenzhen People's Hospital, Second Clinical Medical College of Jinan University	CIN3	NA.	NA.	NA.	Positive	HPV52
